# Supplementary material
Source: publisher site journal article supplement (https://www.dovepress.com/article/269392)

**Supplemental Material 1**

**One-factor model of the PSQ and standardized parameter estimates**

**Abbreviation:** PSQ, Premenstrual Symptoms Questionnaire


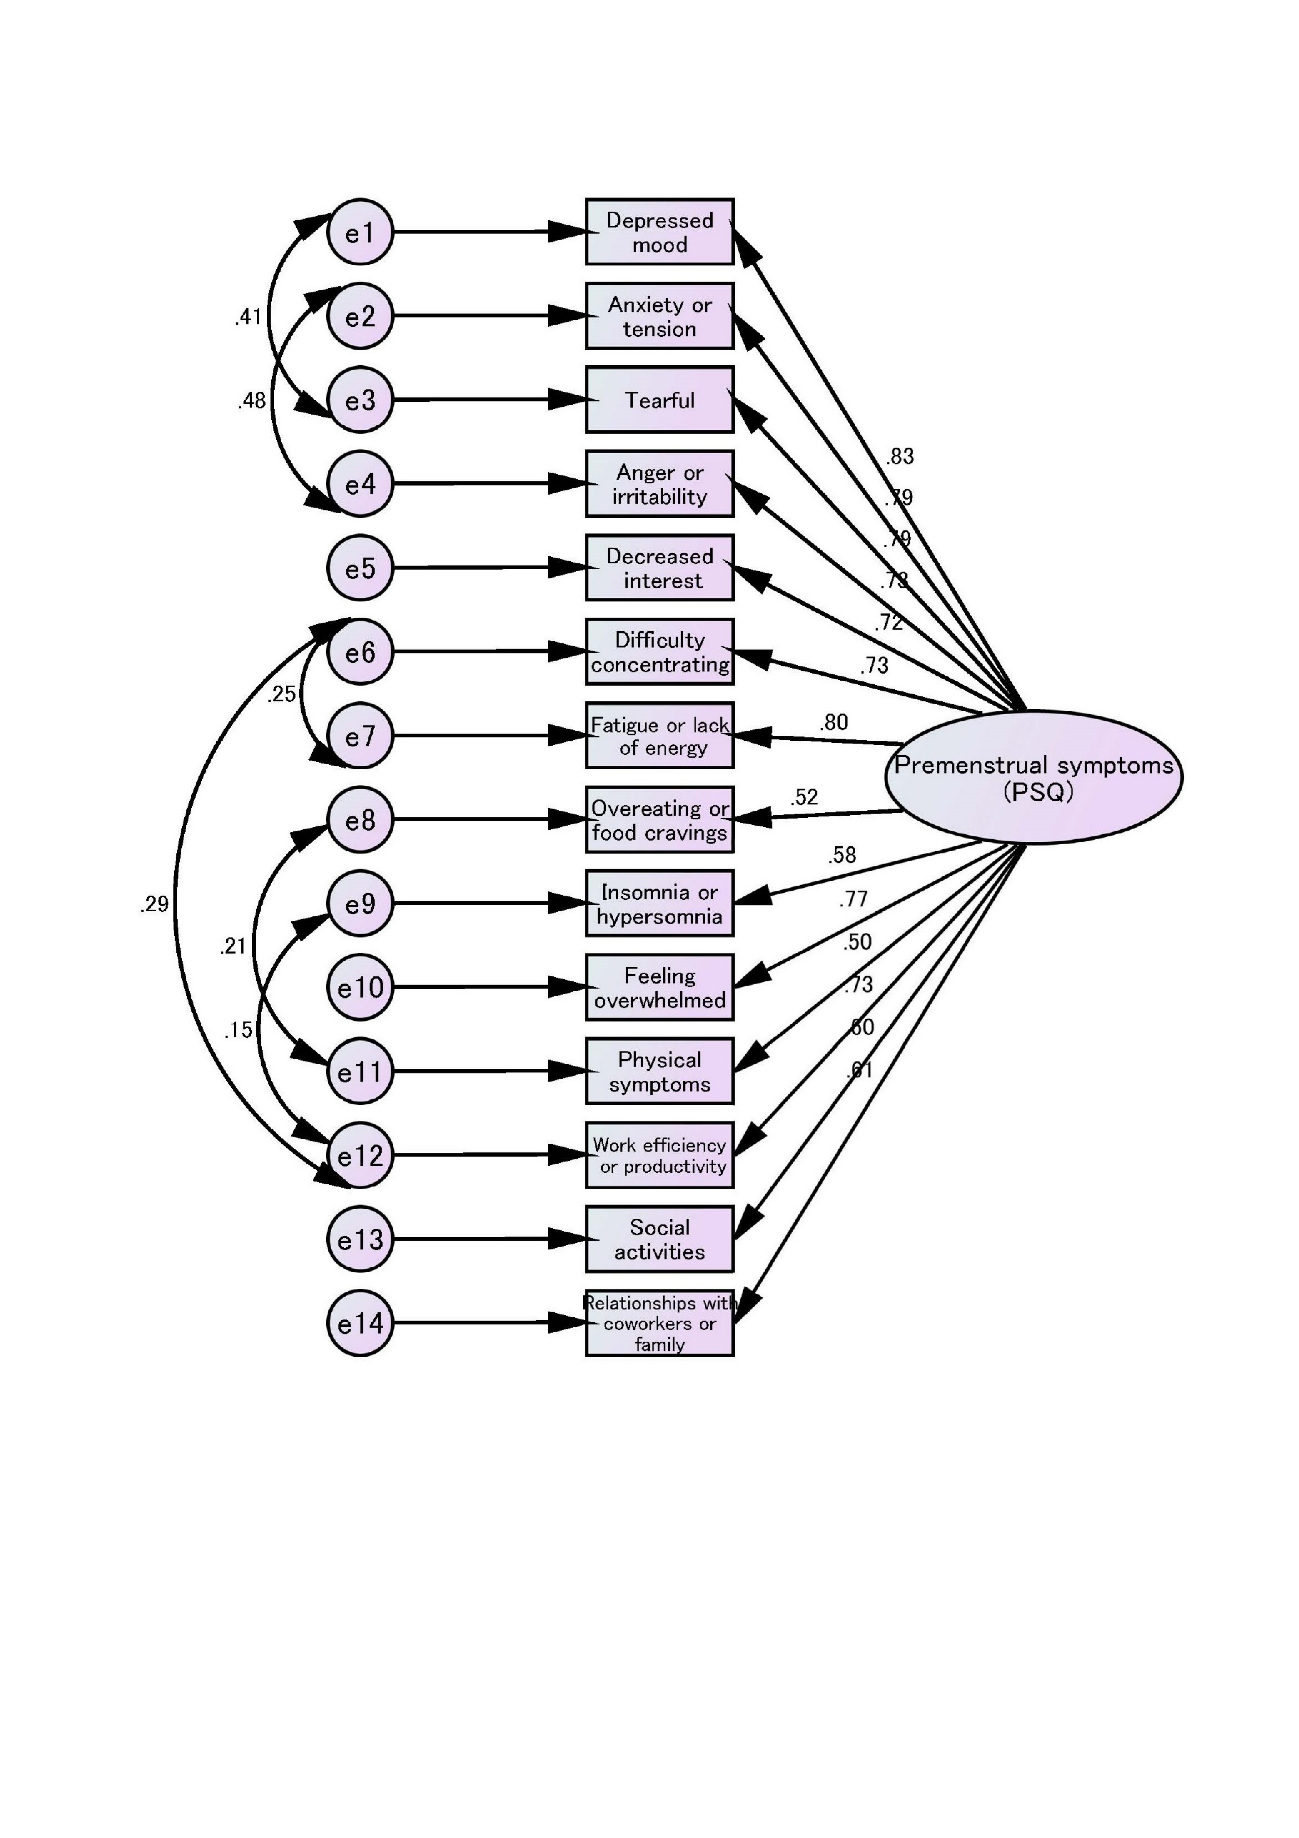


**Supplemental Material 2**

**Two-factor model of the PSQ and standardized parameter estimates**

**Abbreviation:** PSQ, Premenstrual Symptoms Questionnaire


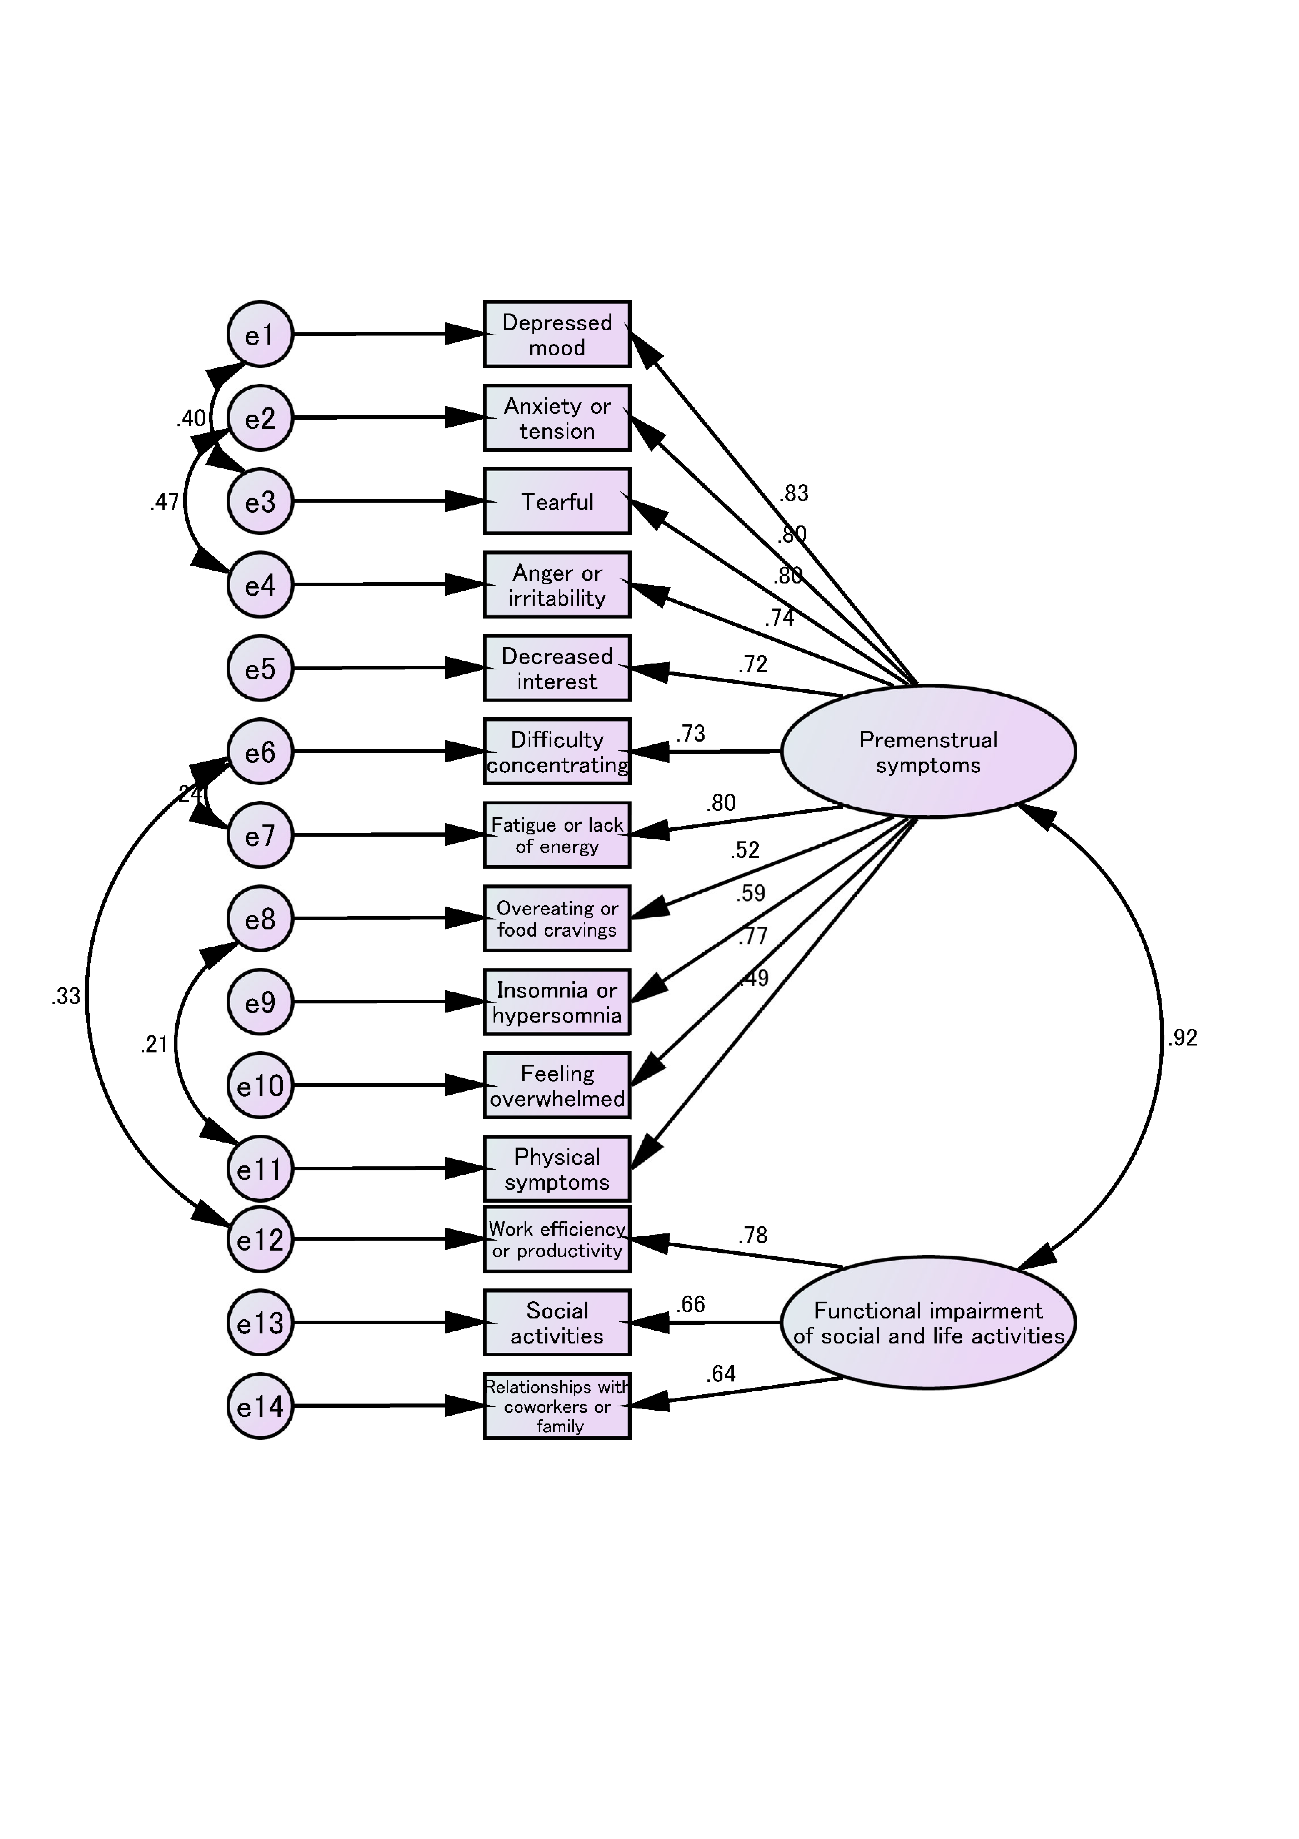

Supplement: Supplementary file 1 [file get_supplementary_file.php]
